# Supplementary material
Source: HighWire-hosted journal article supplement (https://bmjopen.bmj.com/content/14/2/e078264)
Supplement: inline-supplementary-material-3 [file inline-supplementary-material-3.pdf]

Self-monitoring schedule for capillary glucose and ketone monitoring

| ILED                                                                   |                    | Best NHS Care                                             |                    |
|------------------------------------------------------------------------|--------------------|-----------------------------------------------------------|--------------------|
| Ketones (low kcal days)                                                | Glucose            | Ketones (2 days/wk)                                       | Glucose            |
| Fasting before breakfast the morning after each of the low-energy days | Fasting (morning)  | Fasting before breakfast on 2 non-consecutive days / week | Fasting (morning)  |
| 1 hour post evening meal on each of the low-energy days                | 1hr post breakfast | 1 hour post evening meal on 2 non-consecutive days / week | 1hr post breakfast |
|                                                                        | 1hr post lunch     |                                                           | 1hr post lunch     |
|                                                                        | 1hr post dinner    |                                                           | 1hr post dinner    |
