# Supplementary material
Source: HighWire-hosted journal article supplement (https://bmjopen.bmj.com/content/14/2/e078264)
Supplement: inline-supplementary-material-4 [file inline-supplementary-material-4.pdf]

Example of 1 day meal plan for Diet Day

The diet days aim to limit the calories to 1000 calories per day. You are aiming to include 2 (not consecutive) diet days each week. The other 5 days, follow the Mediterranean diet as described earlier. To keep the calories to 1000, the diet day will look like this:

| Mixed diet |                       | Vegetarian/ vegan diet |
|------------|-----------------------|------------------------|
| 4          | Carbohydrate portions | 3                      |
| 6          | Protein portions      | 7                      |
| 5          | Vegetable portions    | 5                      |
| 2          | Fruit portions        | 2                      |
| 3          | Dairy portions        | 3                      |
| 1          | Fat portions          | 1                      |

Below are some examples of meals that can be used to help you follow a 1000 calorie diet.. There are options for a mixed diet or vegan or vegetarian options, if you feel you wanted to try meat free days. Filling up on vegetables will make you feel less hungry

**Mixed diet options**

| Breakfast              | Portion                                                                   | Dairy         | Protein       | Carb          | Veg           | Fruit         | Fat          |
|------------------------|---------------------------------------------------------------------------|---------------|---------------|---------------|---------------|---------------|--------------|
| Grilled lean bacon     | 1 rasher                                                                  | 0             | 1             | 0             | 0             | 0             | 0            |
| Grilled tomatoes       | 7 cherry tomatoes                                                         | 0             | 0             | 0             | 1             | 0             | 0            |
| Tea/ coffee            | 1 mug                                                                     | 0             | 0             | 0             | 0             | 0             | 0            |
| Midmorning             |                                                                           |               |               |               |               |               |              |
| Diet or natural yogurt | 1 small carton                                                            | 1             | 0             | 0             | 0             | 0             | 0            |
| Lunch                  |                                                                           |               |               |               |               |               |              |
| Wholegrain bread       | 2 medium slices                                                           | 0             | 0             | 2             | 0             | 0             | 0            |
| Tuna                   | ⅓ of a 120g can                                                           | 0             | 1             | 0             | 0             | 0             | 0            |
| Green salad            | Cereal bowl full / 80 g with oil-free dressing                            | 0             | 0             | 0             | 1             | 0             | 0            |
| Satsumas               | 2                                                                         | 0             | 0             | 0             | 0             | 1             | 0            |
| Mid afternoon          |                                                                           |               |               |               |               |               |              |
| Low fat cheese         | 30g / match box size                                                      | 1             | 0             | 0             | 0             | 0             | 0            |
| Apple slices           | 1 medium apple (80g)                                                      | 0             | 0             | 0             | 0             | 1             | 0            |
| Tea/ coffee            |                                                                           | 0             | 0             | 0             | 0             | 0             | 0            |
| Evening                |                                                                           |               |               |               |               |               |              |
| Vegetable rice         | 4 tablespoons cooked rice 160g of mix vegetables                          | 0             | 0             | 2             | 2             | 0             | 0            |
| Chicken curry          | 90g /average chicken breast (no skin) & ½ can tomatoes, 1 desertspoon oil | 0             | 3             | 0             | 1             | 0             | 1            |
| Bedtime                |                                                                           |               |               |               |               |               |              |
| Low fat houmous        | 1 level tablespoon                                                        | 0             | 1             | 0             | 0             | 0             | 0            |
| Pepper sticks          | ½ red pepper                                                              | 0             | 0             | 0             | 1             | 0             | 0            |
| Milk                   | 1 small glass                                                             | 1             | 0             | 0             | 0             | 0             | 0            |
| Total portions a day   |                                                                           | 3<br>portions | 6<br>portions | 4<br>portions | 5<br>portions | 2<br>portions | 1<br>portion |

Vegetarian option

| Breakfast                    |                                                    | Dairy      | Protein    | Carb       | Veg        | Fruit      | Fat        |
|------------------------------|----------------------------------------------------|------------|------------|------------|------------|------------|------------|
| Egg                          | 2 poached                                          | 0          | 2          | 0          | 0          | 0          | 0          |
| Mushrooms                    | 2 cupped handfuls / 80g                            | 0          | 0          | 0          | 1          | 0          | 0          |
| Tea/ coffee                  | 1 mug                                              | 0          | 0          | 0          | 0          | 0          | 0          |
| Midmorning                   |                                                    |            |            |            |            |            |            |
| Cheddar cheese               | 1 match box size / 30g                             | 1          | 0          | 0          | 0          | 0          | 0          |
| Cucumber                     | Sliced handful                                     | 0          | 0          | 0          | 1          | 0          | 0          |
| Lunch                        |                                                    |            |            |            |            |            |            |
| Baked beans                  | 2 tablespoons                                      | 0          | 1          | 0          | 0          | 0          | 0          |
| Seeded bread toasted         | 1 medium sliced                                    | 0          | 0          | 1          | 0          | 0          | 0          |
| Blueberries                  | 1 handful                                          | 0          | 0          | 0          | 0          | 1          | 0          |
| Mid afternoon                |                                                    |            |            |            |            |            |            |
| Meat free ham                | 2 slice small                                      | 0          | 1          | 0          | 0          | 0          | 0          |
| Pepper                       | ½ sliced                                           | 0          | 0          | 0          | 1          | 0          | 0          |
| Avocado                      | ¼                                                  | 0          | 0          | 0          | 0          | 0          | 1          |
| Tea/ coffee                  | 1 mug                                              | 0          | 0          | 0          | 0          | 0          | 0          |
| Evening                      |                                                    |            |            |            |            |            |            |
| Vegetarian sausage casserole | 1 grilled sausage                                  | 0          | 2          | 1          | 2          | 0          | 0          |
| Jacket potato (100g)         | 2 cereal bowls vegetables<br>1 ½ egg sized (100 g) |            |            |            |            |            |            |
| Bedtime                      |                                                    |            |            |            |            |            |            |
| Pear                         | 1 medium                                           | 0          | 0          | 0          | 0          | 1          | 0          |
| Low fat cream cheese         | 1 tablespoon                                       | 1          | 0          | 0          | 0          | 0          | 0          |
| Whole wheat cracker          | 2 biscuits                                         | 0          | 0          | 1          | 0          | 0          | 0          |
| Milk                         | 1 small glass                                      | 1          | 1          | 0          | 0          | 0          | 0          |
| Total portions a day         |                                                    | 3 portions | 7 portions | 3 portions | 5 portions | 2 portions | 1 portions |

**Vegan options**

| Breakfast                      |                                                                                           | Dairy equivalent  | Protein           | Carb              | Veg               | Fruit             | Fat               |
|--------------------------------|-------------------------------------------------------------------------------------------|-------------------|-------------------|-------------------|-------------------|-------------------|-------------------|
| Branflakes                     | 3 tablespoons                                                                             | 0                 | 0                 | 1                 | 0                 | 0                 | 0                 |
| Milk- soya                     | 200 ml                                                                                    | 1                 | 0                 | 0                 | 0                 | 0                 | 0                 |
| Tea/ coffee                    | 1 mug                                                                                     | 0                 | 0                 | 0                 | 0                 | 0                 | 0                 |
| <b>Midmorning</b>              |                                                                                           |                   |                   |                   |                   |                   |                   |
| Soya yogurt                    | 3 tablespoons                                                                             | 1                 | 0                 | 0                 | 0                 | 0                 | 0                 |
| <b>Lunch</b>                   |                                                                                           |                   |                   |                   |                   |                   |                   |
| Kidney bean & Vegetable chilli | 3 tablespoons of beans 60g with 1 cereal bowl mixed vegetables & 1/2 can chopped tomatoes | 0                 | 2                 | 1                 | 2                 | 0                 | 0                 |
| Wholemeal pitta                | ½ pitta                                                                                   |                   |                   |                   |                   |                   |                   |
| Banana                         | 1 medium                                                                                  | 0                 | 0                 | 0                 | 0                 | 1                 | 0                 |
| <b>Mid afternoon</b>           |                                                                                           |                   |                   |                   |                   |                   |                   |
| Low fat hummus                 | 2 level tablespoon                                                                        | 0                 | 2                 | 0                 | 0                 | 0                 | 0                 |
| 1 carrot                       | 1 medium carrot (80g)                                                                     | 0                 | 0                 | 0                 | 1                 | 0                 | 0                 |
| Tea/ coffee                    | 1 mug                                                                                     | 0                 | 0                 | 0                 | 0                 | 0                 | 0                 |
| <b>Evening</b>                 |                                                                                           |                   |                   |                   |                   |                   |                   |
| Quinoa                         | 2 tablespoon cooked                                                                       | 0                 | 0                 | 1                 | 0                 | 0                 | 0                 |
| Tofu                           | 4 matchbox                                                                                | 0                 | 2                 | 0                 | 0                 | 0                 | 0                 |
| Mixed salad with edamame beans | 2 x Cereal bowl full with oil free dressing & 1 tablespoons of edamame                    | 0                 | 1                 | 0                 | 2                 | 0                 | 0                 |
| <b>Bedtime</b>                 |                                                                                           |                   |                   |                   |                   |                   |                   |
| Peanut butter                  | 1 heaped teaspoon                                                                         | 0                 | 0                 | 0                 | 0                 | 0                 | 1                 |
| Apple                          | 1 medium sliced                                                                           | 0                 | 0                 | 0                 | 0                 | 1                 | 0                 |
| Milk                           | 1 small glass                                                                             | 1                 | 0                 | 0                 | 0                 | 0                 | 0                 |
| <b>Total portions a day</b>    |                                                                                           | <b>3 portions</b> | <b>7 portions</b> | <b>2 portions</b> | <b>5 portions</b> | <b>2 portions</b> | <b>1 portions</b> |

To help with estimation of portions the following tables outline weight and measures of the different food groups. Where possible household measures are given to make things a little easier. Use these to help you plan your 2 days in the week of 1000 calories.

| <b>Carbohydrate</b><br><b>4 portions - mixed diet</b><br><b>3 portions - vegan/vegetarian</b>                                 | <b>Equal to</b>                                                                |
|-------------------------------------------------------------------------------------------------------------------------------|--------------------------------------------------------------------------------|
| Wholewheat or oat breakfast cereal, e.g. wholewheat biscuit, malted wholewheat squares, Grapenuts, bran flakes, fruit & fibre | 24g or 3 tablespoons or 1 whole wheat biscuit                                  |
| Porridge oats or no-added sugar muesli                                                                                        | 20g or 1 heaped tablespoon                                                     |
| Wholegrain, wholemeal, rye, granary bread                                                                                     | 36g or medium slice of bread (other than rye), 1½ slices of rye, or ½ roll     |
| Wholemeal or multigrain pitta bread or tortilla wrap, chapatti made without fat                                               | 60g or 1x 8" tortilla or 1 standard pitta or small thin chapatti               |
| Rye crispbread, crackers, oak cakes                                                                                           | 22g or 2 crispbreads/ 2 oatcakes                                               |
| Wholegrain rice cake                                                                                                          | 16g or 2 rice cakes                                                            |
| Wholewheat pasta or rice - cooked amount<br>Cous cous, Bulgar wheat, Quinoa, Pearl barley                                     | 1 tablespoon uncooked 2<br>tablespoons cooked<br>30g- raw weight or 60g cooked |
| Lasagne (wholemeal if possible)                                                                                               | 20g raw weight or 1 large sheet or 1½ smaller sheets                           |
| Noodles (wholemeal if possible)                                                                                               | 25g raw weight or ½ block/nest                                                 |
| Baked or boiled potato (in skin), cassava, sweet potato                                                                       | 1½ egg sized potatoes or 100g raw weight                                       |
| Wholemeal pizza base (topping is from other food groups)                                                                      | 35g or ⅙ of thin 10" pizza base                                                |
| Unsweetened popcorn                                                                                                           | 20g or 2 handfuls                                                              |

| <b>Protein</b><br><b>6 portions – mixed diet</b><br><b>7 portions – vegan/vegetarian</b>                                                                                                               | <b>Equal to</b>                                                       |
|--------------------------------------------------------------------------------------------------------------------------------------------------------------------------------------------------------|-----------------------------------------------------------------------|
| Fresh or smoked white fish (e.g. haddock or cod)                                                                                                                                                       | 60g or 2oz<br>2 fish finger size                                      |
| Seafood, e.g. prawns, mussels, crab                                                                                                                                                                    | 45g or 1½oz                                                           |
| Canned tuna or salmon in brine or spring water                                                                                                                                                         | 45g or 1½oz<br>⅓ standard tin (120g)                                  |
| Oily fish (fresh or tinned in tomato sauce or olive oil - drained), e.g. mackerel, sardines, salmon, fresh tuna, kippers, smoked salmon or trout                                                       | 30g or 1oz or<br>¼ standard tin (120g) or<br>¼ fillet of salmon       |
| Chicken, turkey, duck, pheasant (cooked without skin)<br>Lean beef, pork, lamb, rabbit, venison, offal (fat removed)<br><b>Quorn fillets, steak, mince or pieces</b><br><b>Vegetarian mince frozen</b> | 30g or 1oz or<br>1 slice size of playing card                         |
| Lean grilled bacon<br><b>Quorn ham</b>                                                                                                                                                                 | 25g or ¾oz or<br>1 rasher                                             |
| Lean ham<br><b>Quorn bacon rashers (not slices)</b>                                                                                                                                                    | 30g or 1oz or<br>1 medium, 2 small or 4 wafer thin slices             |
| Eggs                                                                                                                                                                                                   | 60 g or 2 oz or<br>1 egg                                              |
| Tofu                                                                                                                                                                                                   | 50g or 1⅔ oz or<br>Size of 2 match boxes                              |
| Tempeh                                                                                                                                                                                                 | 25 g or 1 oz or<br>Size of 1 match box                                |
| Baked beans (reduced sugar)                                                                                                                                                                            | 60 g or 2 oz or<br>2 tablespoons                                      |
| Lentils, chickpeas and kidney beans, mung beans, black eye beans, puy lentils, toor dahl, urad dahl,<br>Raw weight                                                                                     | 20g or ⅔ oz or<br>1 tablespoon raw                                    |
| Cooked or tinned weight                                                                                                                                                                                | 65g or 2oz or<br>1½ tablespoons cooked /tinned<br>or 1 cupped handful |
| Soya beans (frozen or cooked) or edamame beans                                                                                                                                                         | 30g or 1oz or<br>1 tablespoon                                         |
| Vegetarian sausage                                                                                                                                                                                     | 25g or ¾ oz or ½ sausage                                              |
| Textured vegetable protein (TVP)                                                                                                                                                                       | 10g or ⅓ oz uncooked or<br>1 heaped tablespoon uncooked               |
| Low fat hummus                                                                                                                                                                                         | 30g or 1oz or<br>1 level tablespoon                                   |

| <b>Vegetables – min 5 portions</b><br><b>1 portion = 80g or 2⅔oz</b>                                                                                                                                                                                                                                         | <b>1 portion is equal to</b>                                                                                                    |
|--------------------------------------------------------------------------------------------------------------------------------------------------------------------------------------------------------------------------------------------------------------------------------------------------------------|---------------------------------------------------------------------------------------------------------------------------------|
| Asparagus, Aubergines, Broccoli, Brussel sprouts, Carrots, Cabbage, Cauliflower, Chinese leaves, Courgettes, Cucumber, Curly kale, Green beans, Lettuce (mixed leaves), Mange tout, Methi, Mushrooms, Okra, Pak choi, Peas, Sugar snap, Spinach, Spring greens cooked, Sweetcorn, Tomatoes, Watercress fresh | 80g or 2 ⅔ oz or 2 spears of broccoli, 8 cauliflower florets. 3 heaped tablespoons of vegetables or large cereal bowl of salad. |

| <b>Fruit - 2 portions.</b><br><b>1 portion = 80g or 2⅔oz (30g or 1oz dried fruits)</b>                 | <b>1 portion is equal to</b>      |
|--------------------------------------------------------------------------------------------------------|-----------------------------------|
| Berries (e.g. blackberries, blueberries, redcurrants, raspberries, strawberries)<br>Cherries or grapes | 80g or 2⅔oz<br>1 handful          |
| Grapefruit, guava and mango                                                                            | 80g or 2⅔oz or<br>½ a whole fruit |
| Large fruit (e.g. melon, pineapple, papaya)                                                            | 80g or 2⅔oz or<br>1 medium slice  |
| Medium fruits (e.g. apple, pear, nectarine, orange, peach, banana, pomegranate)                        | 80g or 2⅔oz<br>1 fruit            |
| Small fruit (e.g. fresh apricots, kiwi, clementine, passion fruit, plums)                              | 80g or 2⅔oz or<br>2 fruits        |
| Any stewed fruit—unsweetened or with calorie-free sweetener e.g. apple, rhubarb                        | 80g or 2⅔oz or<br>3 tablespoons   |
| Kumquats, lychees, physalis                                                                            | 5 fruits                          |
| Dried fruits (raisins, currants, apricots)                                                             | 30g or 1oz or<br>1 tablespoon     |

| <b>Milk and dairy foods - 3 portions</b>                                                                                                                           | <b>Equal to</b>                                                |
|--------------------------------------------------------------------------------------------------------------------------------------------------------------------|----------------------------------------------------------------|
| Milk (semi-skimmed or skimmed)<br>Alternative 'milks' with added calcium, e.g. soya **                                                                             | ⅓ pint or 200ml or<br>1 small glass                            |
| Diet yoghurts, Low fat/fat-free Greek or Greek Style or natural yoghurts, fromage frais or plain soya yoghurt, high protein yogurt                                 | 120-150g or 4-5oz or<br>1 small pot or<br>3 tablespoons        |
| Whole milk natural yogurt                                                                                                                                          | 80g or 1 ⅔ oz or<br>2 tablespoons                              |
| Cottage cheese                                                                                                                                                     | 75g or 1½oz or<br>¼ pot, 2 tablespoons                         |
| Cream cheese (light or extra light)                                                                                                                                | 30g or 1oz or<br>1 tablespoon                                  |
| Lower fat hard cheeses e.g.:<br>Reduced fat cheddar, Edam,<br>Bavarian smoked, feta, ricotta, mozzarella, reduced fat halloumi, paneer made from semi-skimmed milk | 30g or 1oz or Matchbox size<br>No more than 180g or 6oz a week |

\*\* we recommend soya milk as coconut, oat and almond milks are lower in protein and calcium

| Fat – 2 portions only                                                                                                        | Equal to                                                                                                |
|------------------------------------------------------------------------------------------------------------------------------|---------------------------------------------------------------------------------------------------------|
| Margarine or low-fat spread (avoid the buttery types)<br>Olive oil or other oil<br>Oil based dressing<br>Pesto<br>Mayonnaise | 8g or 1 teaspoon<br>1 dessertspoon of oil                                                               |
| Seeds (e.g. linseed, pumpkin, sunflower, sesame, chia, hemp)                                                                 | 7g or 1 dessertspoon                                                                                    |
| Unsalted or salted or dry roasted nuts                                                                                       | 7g or 1 dessertspoon<br>3 walnut halves, 3 Brazil,<br>4 almonds, 8 peanuts,<br>10 cashews or pistachios |
| Olives                                                                                                                       | 50g or 10 olives                                                                                        |
| Low fat mayonnaise, Curry paste or Harissa paste                                                                             | 15g or ½ oz or 1 tablespoon                                                                             |
| Peanut butter (without palm oil)                                                                                             | 11g or ⅓ oz or<br>1 heaped teaspoon                                                                     |
| Cocoa powder                                                                                                                 | 12 g or ⅓ oz or<br>2 heaped teaspoons                                                                   |
| Avocado                                                                                                                      | 40g or 1⅓ oz or<br>1/4 of an average pear                                                               |
| Low fat guacamole                                                                                                            | 40g or 1⅓ oz or 2 tablespoons                                                                           |
