# Supplementary material
Source: HighWire-hosted journal article supplement (https://bmjopen.bmj.com/content/14/2/e078264)
Supplement: inline-supplementary-material-5 [file inline-supplementary-material-5.pdf]

**Medical Management Protocols**

**Hypoglycaemia**

Participants will be advised to take 15-20g of rapid acting carbohydrate in the event of hypoglycaemia, (defined as blood glucose <4 mmol/L) which is anticipated to raise blood glucose by 3 mmol/L. Examples of rapid acting carbohydrate include 170-225ml Lucozade Original (not Lucozade Sport), a small carton of fruit juice, 5-6 glucose tablets, 4/5 jelly babies, or a small tin of cola (150-200ml). Participants will be advised to repeat the treatment every 15 minutes until blood glucose is ≥4 mmol/l. The following table highlights when participants should consider taking additional follow-up slower acting carbohydrate:

| Situation                              | Acceptable slow acting carbohydrate |
|----------------------------------------|-------------------------------------|
| Less than 1 hour before the next meal  | Try and avoid                       |
| 1-2 hour before the next meal          | 10g                                 |
| More than 2 hours before the next meal | 15-20g                              |

**Ketonaemia**

Ketone levels ≥1.0 mmol/L on a fasting sample:

- Drink 1L fluids and repeat ketone levels after 4 hours.
- If ketone level has improved (<1.0mmol/L), no further action required.
- If ketone level has increased or remains the same, repeat ketone level after 2 hours.
- If ketone level is persistently increased, consume 40g carbohydrates and repeat in 2 hours.
- Continue to do this until ketone levels <1.0mmol/L.

If a participant experiences >2 episodes of the above throughout the course of the study their notes will be reviewed by the PI and their suitability for remaining in the trial will be assessed.

**Guidance for the introduction of diabetes medication (week 24-delivery)**

Diabetes medication will be introduced according to the following protocol:

- If  $\geq 25\%$  fasting blood glucose readings are  $>5$  mmol/l and/or  $\geq 25\%$  of 1 hour postprandial glucose readings are  $>7$  mmol/l in a 7 day period: commence Metformin MR 500 mg daily to be increased every 3 days by 500 mg to 1 gram BD if tolerated.
- If after reaching optimal or maximum tolerated dose Metformin  $\geq 25\%$  fasting blood glucose readings are  $>5$  mmol/l in a 7-day period: commence bedtime isophane insulin 4 units and uptitrate the dose by 2 units every 3 days aiming for a fasting glucose of  $\leq 5$  mmol/l,
- and/or  $\geq 25\%$  of 1 hour postprandial glucose readings are  $>7$  mmol/l in a 7 day period: commence prandial fast acting insulin analogue (Humalog or Novorapid) 2-4 units with the relevant meal. Uptitrate the dose by 2 units every 3 days aiming for a 1 hour postprandial glucose of  $\leq 7$  mmol/l.
- Medication adjustment will be made in accordance with the above guidance.
